# Supplementary material
Source: publisher site journal article supplement (https://www.dovepress.com/article/255785)
Supplement: Supplementary file 1 [file get_supplementary_file.php]

**Supplementary File One**

**Verification form**

| Question                                                                                                                                                      | Response                            |                                    |
|---------------------------------------------------------------------------------------------------------------------------------------------------------------|-------------------------------------|------------------------------------|
| <b><i>Response to each question must be 'yes' for paper to be included</i></b>                                                                                |                                     |                                    |
| Is the paper a randomized controlled trial?                                                                                                                   | Yes <input type="checkbox"/>        | No <input type="checkbox"/>        |
| Is the paper nurse-led (is the first or last author a nurse as per listed qualifications)?                                                                    | Yes <input type="checkbox"/>        | No <input type="checkbox"/>        |
| Is the article published between January 2014 – May 2019?                                                                                                     | Yes <input type="checkbox"/>        | No <input type="checkbox"/>        |
| Is the topic of the paper related to perioperative care at one or more phases (pre-admission; preoperatively; intraoperatively; immediately postoperatively)? | Yes <input type="checkbox"/>        | No <input type="checkbox"/>        |
|                                                                                                                                                               |                                     |                                    |
| <b>Eligible for inclusion?</b>                                                                                                                                | <b>Yes <input type="checkbox"/></b> | <b>No <input type="checkbox"/></b> |

**Supplementary File Two: Data Extraction Form**

|                                    |  |                            |  |
|------------------------------------|--|----------------------------|--|
| <b>Author(s)</b>                   |  |                            |  |
| <b>Year of publication</b>         |  | <b>Country of origin</b>   |  |
| <b>Primary Aim</b>                 |  |                            |  |
| <b>Secondary Aim(s)</b>            |  |                            |  |
| <b>Study population</b>            |  |                            |  |
| <b>Sample size</b>                 |  | <b>Study design</b>        |  |
| <b>Intervention</b>                |  |                            |  |
| <b>Comparator(s)</b>               |  |                            |  |
| <b>Timing of intervention</b>      |  |                            |  |
| <b>Timing of comparator</b>        |  |                            |  |
| <b>Outcome measurements</b>        |  |                            |  |
| <b>Outcome Assessor</b>            |  | <b>Outcome time points</b> |  |
| <b>Outcome measurement methods</b> |  |                            |  |
| <b>Findings</b>                    |  |                            |  |
| <b>Primary outcome</b>             |  |                            |  |
| <b>Secondary outcome(s)</b>        |  |                            |  |
| <b>Reviewer Comments</b>           |  |                            |  |
| <b>Funding Source</b>              |  |                            |  |

### Supplementary File Three: Table of Included Studies

| First author, year               | Country                    | Primary aim                                                                                                                                             | Primary outcome | Secondary outcome/s                                                      | Participant age     | Surgical Population                                                                | Total sample size (n) | Timing of intervention (I) & outcome (O)                                                                                                   | Funding                                                                                                        |
|----------------------------------|----------------------------|---------------------------------------------------------------------------------------------------------------------------------------------------------|-----------------|--------------------------------------------------------------------------|---------------------|------------------------------------------------------------------------------------|-----------------------|--------------------------------------------------------------------------------------------------------------------------------------------|----------------------------------------------------------------------------------------------------------------|
| Al-Azawy, 2015                   | Norway                     | To compare and evaluate the effect of premedication, standardised preoperative information & anxiety on pain intensity, drug consumption & satisfaction | Pain intensity  | Preoperative anxiety on pain intensity and drug consumption              | Adults >18yrs       | Patients undergoing ablation for atrial fibrillation (AF) under conscious sedation | 60                    | I: Preoperative information, medication 1hr prior to surgery<br>O: Baseline, during and after procedure                                    | Supported by Department of Heart Disease Haukeland University Hospital, Bergen. No specific funding mentioned. |
| Al-Yateem, 2016                  | United Arab Emirates (UAE) | To assess play distraction versus premedication                                                                                                         | Anxiety (MyPas) | Anxiety (STAIC)                                                          | Pediatric: aged 3-8 | ASA I-II undergoing elective day surgery under general anesthesia (GA)             | 168                   | I: One hour prior to surgery<br>O: During anesthesia, preoperatively, induction, postoperatively, upon discharge.                          | Funded by a grant from University of Sharjah.                                                                  |
| Ayik, 2018                       | Turkey                     | To measure effects of lavender oil aromatherapy massage versus usual care                                                                               | Anxiety (STAI)  | Sleep quality                                                            | Adults >18yrs       | Colorectal surgery                                                                 | 80                    | I: Preoperatively: night before and morning of surgery<br>O: Preoperatively night before and morning of surgery (after massage/usual care) | No specific grant funding received.                                                                            |
| Baker* (clinical trial protocol) | USA                        | To compare IV versus oral acetaminophen (paracetamol)                                                                                                   | Pain            | 1.Opioid consumption<br>2.PONV<br>4.Postoperative respiratory depression | Adults >18yrs       | Multiple surgical specialities                                                     | 120                   | I: Preoperatively<br>O: Within 24 hours (except patient satisfaction: 2 days postoperatively)                                              | Not stated                                                                                                     |

Nurse-led randomized controlled trials in the perioperative setting: a scoping review

|                    |         |                                                                                                            |                                                |                                                                                                                                                                                                       |                       |                                    |     |                                                                                                                     |                                                                                                                                                                                                 |
|--------------------|---------|------------------------------------------------------------------------------------------------------------|------------------------------------------------|-------------------------------------------------------------------------------------------------------------------------------------------------------------------------------------------------------|-----------------------|------------------------------------|-----|---------------------------------------------------------------------------------------------------------------------|-------------------------------------------------------------------------------------------------------------------------------------------------------------------------------------------------|
|                    |         |                                                                                                            |                                                | 5.Administration of reversal agents<br>6. PACU length of stay (LOS)<br>7.Satisfaction                                                                                                                 |                       |                                    |     |                                                                                                                     |                                                                                                                                                                                                 |
| Bakhshi 2014       | Iran    | To assess effects of positioning and early sandbag removal                                                 | Back pain                                      | 1. Foot pain<br>2.Haematoma<br>3.Dorsalis pedis pulse<br>4.Bleeding                                                                                                                                   | Adults                | Post coronary angiography patients | 80  | I: After catheterization<br>O: 1,2,3, 6hrs postoperatively and the following morning                                | No statement of funding evident.                                                                                                                                                                |
| Baradaranfar, 2018 | Iran    | To evaluate impact of warming (forced air versus warmed IV fluids versus control) on physiological indices | Core body temperature                          | 1.Blood pressure<br>2.Heart rate<br>3.Shivering                                                                                                                                                       | Adults aged 18-65yrs  | Laparoscopic cholecystectomy       | 96  | I: From induction of anesthesia until PACU discharge<br>O: Before induction of anesthesia until discharge from PACU | Funding by Isfahan University of Medical Sciences                                                                                                                                               |
| Brix, 2016         | Denmark | To compare two anesthetic techniques                                                                       | Postoperative pain: NRS                        | 1.Intraoperative fentanyl use<br>2.Analgesic and antiemetic use in PACU<br>3.PONV occurrence<br>4.Time to PACU discharge<br>5.Recalled worst pain after discharge<br>6. Recalled PONV after discharge | Adults: females       | Ambulatory operative hysterectomy  | 153 | I: Initial surgery<br>O: Immediately postoperatively; two weeks post-discharge                                      | Author has received funding from Family Hede Nielsen Foundation, the Gurli and Hans Engell Friis Foundation, the Aase and Ejnar Danielsens Foundation, and the Health Research Fund of Denmark. |
| Çakar, 2017        | Turkey  | To assess preoperative oral carbohydrate vs standard fasting                                               | Preoperative discomfort: hunger; thirst; mouth | 1.Postoperative complications; physiological parameters; PONV; pain                                                                                                                                   | Adults; aged 16-80yrs | Thyroidectomy                      | 95  | I: From 00.00hrs night before surgery<br>O: 10pm, 6am prior to surgery; every 2 hrs post-surgery                    | No statement of funding.                                                                                                                                                                        |

Nurse-led randomized controlled trials in the perioperative setting: a scoping review

|                |        |                                                                                        |                                  |                                                                   |                                   |                              |    |                                                                                                                                                                 |                                                                                                                                                                                                                                                                                                            |
|----------------|--------|----------------------------------------------------------------------------------------|----------------------------------|-------------------------------------------------------------------|-----------------------------------|------------------------------|----|-----------------------------------------------------------------------------------------------------------------------------------------------------------------|------------------------------------------------------------------------------------------------------------------------------------------------------------------------------------------------------------------------------------------------------------------------------------------------------------|
|                |        |                                                                                        | dryness; chill; headache         |                                                                   |                                   |                              |    |                                                                                                                                                                 |                                                                                                                                                                                                                                                                                                            |
| Carlsson, 2018 | Sweden | To assess the effectiveness of preoperative visits to the operating theatre on anxiety | Anxiety: m-YPAS                  | Parental anxiety: STAI                                            | Pediatric, 3-12years and parents. | ENT Day Surgery              | 57 | I: Prior to the day of surgery<br>O: In the waiting room; after arrival to OR, at anesthesia induction. Parents: in waiting room, and once child anaesthetised. | Centre of clinical research in Värmland supporting the project.                                                                                                                                                                                                                                            |
| Carr, 2015     | USA    | To compare P6 stimulation versus control on PONV                                       | PONV (Likert Nausea Scale Score) | Nil                                                               | Adult females aged 18-67yrs       | Laparoscopic cholecystectomy | 56 | I: Intraoperatively<br>O: on admission to PACU; at 30 and 60 mins, PACU discharge, at home up to 24hrs                                                          | No statement of funding.                                                                                                                                                                                                                                                                                   |
| Charette, 2015 | Canada | To assess guided imagery and relaxation combined with education versus usual care      | Pain intensity                   | 1.Anxiety (STAI-Y)<br>2.Coping strategies<br>3.Regular activities | Adolescents and young adults      | Spinal fusion for scoliosis  | 40 | I: Commenced preoperatively<br>O: Day of surgery to 2 weeks post-discharge                                                                                      | Funded by the Canadian Nurses Foundation, the Quebec Inter-university Nursing Intervention Research Group (GRIISIQ), the Quebec Ministry of Education, Recreation and Sports, the Fonds de Recherche du Québec-Santé (FRQS), The Saite Justine Hospital Foundation, the Foundation of Stars and the Gustav |

Nurse-led randomized controlled trials in the perioperative setting: a scoping review

|                 |        |                                                                                    |                                                   |                                                                                                                                           |                                  |                                           |     |                                                                                                                                                                          |                                                                                                                                                                      |
|-----------------|--------|------------------------------------------------------------------------------------|---------------------------------------------------|-------------------------------------------------------------------------------------------------------------------------------------------|----------------------------------|-------------------------------------------|-----|--------------------------------------------------------------------------------------------------------------------------------------------------------------------------|----------------------------------------------------------------------------------------------------------------------------------------------------------------------|
|                 |        |                                                                                    |                                                   |                                                                                                                                           |                                  |                                           |     |                                                                                                                                                                          | Levinschi Foundation.                                                                                                                                                |
| Chartrand, 2017 | Canada | To examine the effect of a preoperative DVD on parental knowledge vs standard care | Parental knowledge                                | 1.Participation<br>2.Anxiety<br>3.Children's distress<br>4.Analgesia<br>5.Length of recovery                                              | Parent-child dyads: ages 3-10yrs | Elective ENT outpatient or dental surgery | 105 | I: After pre-assessment clinic appointment<br>O: In the recovery room until discharge from day care surgery.                                                             | Study funded by Children's Hospital of Eastern Ontario Research Institute Surgery Associates Research and Development Fund. First author also received Scholarships. |
| Chen, 2014      | USA    | To compare CO <sub>2</sub> versus room air insufflation                            | Discomfort                                        | Abdominal girth                                                                                                                           | Adults >18yrs                    | Screening colonoscopy                     | 98  | I: During colonoscopy<br>O: Upon arrival to recovery room; at time of post-anaesthesia recovery (PAR) score of 10 or pre-procedure baseline; when eligible for discharge | No funding received.                                                                                                                                                 |
| Chen, 2015      | Taiwan | To assess effects of music versus no music on psychophysiological responses        | Psychophysiological parameters (HR; RR; SBP; DBP) | 1.Pain (VAS)<br>2.Opioid dosage                                                                                                           | Adults                           | Elective total knee replacement (TKR)     | 30  | I: Preoperatively; in OT and in PACU<br>O: Preoperatively, in surgical waiting area, in PACU and in postoperative ward                                                   | No funding statement.                                                                                                                                                |
| Chevillon, 2015 | USA    | To evaluate impact of multifaceted preoperative education vs standard care         | Postoperative delirium                            | 1.Anxiety: STAI<br>2.Knowledge<br>3.Predictors of delirium<br>4.Days of mechanical ventilation<br>5.Intensive care unit (ICU) stay (days) | Adults                           | Pulmonary thromboendarectomy              | 129 | I: One day prior to surgery<br>O: Intraoperatively (cardiopulmonary indicators); daily for up to 7 days after surgery or until ICU discharge                             | No funding statement.                                                                                                                                                |

Nurse-led randomized controlled trials in the perioperative setting: a scoping review

|                |             |                                                                                                          |                                                  |                                                                                                                                                       |                         |                                                                                                    |     |                                                                                                     |                                                                                                                                                                                                                                 |
|----------------|-------------|----------------------------------------------------------------------------------------------------------|--------------------------------------------------|-------------------------------------------------------------------------------------------------------------------------------------------------------|-------------------------|----------------------------------------------------------------------------------------------------|-----|-----------------------------------------------------------------------------------------------------|---------------------------------------------------------------------------------------------------------------------------------------------------------------------------------------------------------------------------------|
| Choi, 2018     | South Korea | To compare durations of bed rest and immobilisation (3 groups)                                           | Incidence of post-dural puncture headache (PDPH) | Backache                                                                                                                                              | Adults >18yrs           | Elective orthopaedic knee or hip, or bladder surgery, or haemorrhoidectomy under spinal anesthesia | 138 | I: Post-surgery<br>O: Immediate post-ward transfer then daily for 5 days                            | No funding statement.                                                                                                                                                                                                           |
| Conway, 2017   | Australia   | To assess effectiveness of forced air warming vs usual care (passive warming) for hypothermia prevention | Post-procedure temperature                       | 1. Shivering<br>2. Thermal comfort<br>3. Major postoperative complications<br>4. Cardiovascular complications, cardioversion or myocardial infarction | Adults >18yrs           | Interventional cardiovascular procedures <30mins duration with sedation                            | 140 | I: During procedure<br>O: During procedure; postoperatively; at 30 days (complications)             | First author awarded an NHMRC Early Career Fellowship. Study funded by St Vincent's Clinic Foundation Multidisciplinary Patient Focused Research Grant. Equipment provided by Covidien Investigator Sponsored Research Program. |
| Dehghan, 2017  | Iran        | To compare dramatic puppet versus therapeutic play versus usual care                                     | Anxiety                                          | Nil                                                                                                                                                   | Pediatric: between 6-12 | Appendectomy                                                                                       | 75  | I: Preoperatively: morning of surgery<br>O: Night before surgery; preoperatively before anaesthesia | Supported by Mashhad University of Medical Sciences.                                                                                                                                                                            |
| Deitrick, 2015 | USA         | To compare two doses of IV promethazine (6.25mg versus 12.5mg)                                           | PONV (verbal descriptive scale)                  | Postoperative sedation (institution's internal sedation scale)                                                                                        | Adults aged 18-75yrs    | Ambulatory surgery                                                                                 | 120 | I: Throughout Phase I and Phase II recovery<br>O: Throughout Phase I and Phase II recovery          | Combined AORN/STTI International Small Grant                                                                                                                                                                                    |

Nurse-led randomized controlled trials in the perioperative setting: a scoping review

|                      |        |                                                                                                                |                                                                                                |                                                                                              |                                             |                                                             |     |                                                                                                                                               |                                                                                                                                              |
|----------------------|--------|----------------------------------------------------------------------------------------------------------------|------------------------------------------------------------------------------------------------|----------------------------------------------------------------------------------------------|---------------------------------------------|-------------------------------------------------------------|-----|-----------------------------------------------------------------------------------------------------------------------------------------------|----------------------------------------------------------------------------------------------------------------------------------------------|
| Dickinson, 2015      | USA    | To assess silver impregnated dressings versus dry sterile dressings                                            | Wound healing                                                                                  | Infection                                                                                    | Adults                                      | Cardiac surgery with sternotomy wound                       | 315 | I: Incision closure<br>O: 5 days postoperatively and throughout recovery                                                                      | No funding statement but dressings donated by manufacturers.                                                                                 |
| Duparc-Alegria, 2018 | France | To assess impact of short hypnotic session versus usual care                                                   | Postoperative pain: VAS                                                                        | 1.Anxiety level<br>2.Total morphine consumption                                              | Pediatric: aged over 10yrs, less than 18yrs | Routine major orthopaedic surgery                           | 119 | I: Just prior to surgery<br>O: 24hrs postoperatively                                                                                          | Funded by Ministry of Health grant, and sponsored by Assistance-Publique-Hôpitaux de Paris-Direction Recherche Clinique et du Développement. |
| Erdling, 2015        | Sweden | To compare oesophageal and nasopharyngeal temperature in patients receiving prewarming vs no prewarming        | Difference in temperature change between devices and warming groups                            | Effect of prewarming, age and Body Mass Index (BMI) upon measured temperatures (two devices) | Adults                                      | Elective open colorectal surgery under combined anaesthesia | 53  | I: Preoperatively (prewarming) or intraoperatively<br>O: Before epidural; after test dose; anaesthesia start and then at 30 min intervals     | No funding statement.                                                                                                                        |
| Ertug, 2017          | Turkey | To compare nature sounds vs relaxation exercises vs no intervention                                            | Anxiety                                                                                        | Nil                                                                                          | Adults >18yrs                               | Elective surgery (under GA)                                 | 159 | I: Day of surgery<br>O: Day of surgery: recruitment, after intervention, 30 minutes post-intervention                                         | No funding statement.                                                                                                                        |
| Fetzer, 2018         | USA    | To assess effectiveness of pre-emptive preoperative belladonna and opium (B+O) suppository versus routine care | Postoperative bladder comfort (bladder urgency via 5 point Likert scale and pain via 0-10 VAS) | 1.Narcotic requirements<br>2.LOS                                                             | Adults                                      | Ureteroscopy                                                | 50  | I: After anesthesia induction and before insertion of surgical scope<br>O: During PACU at every 15 mins until discharge; outpatient discharge | One author funded by Vermont/New Hampshire Association of Perianesthesia Nurses for cost of study medication                                 |



Nurse-led randomized controlled trials in the perioperative setting: a scoping review

|                     |        |                                                                                      |                                    |                                                                                                                                                                 |                         |                                 |     |                                                                                                                                                        |                                                                                                   |
|---------------------|--------|--------------------------------------------------------------------------------------|------------------------------------|-----------------------------------------------------------------------------------------------------------------------------------------------------------------|-------------------------|---------------------------------|-----|--------------------------------------------------------------------------------------------------------------------------------------------------------|---------------------------------------------------------------------------------------------------|
| Franzoi, 2016       | Brazil | To compare listening to music versus usual care (toys and television)                | Anxiety                            | 1.Heart rate (HR)<br>2.Systolic blood pressure (SBP)<br>3.Diastolic blood pressure (DBP)<br>4.Respiratory rate (RR)<br>4. Oxygen saturation (SaO <sub>2</sub> ) | Pediatric: aged 3-12yrs | Elective surgery under GA       | 52  | I: Day of surgery<br>O: 15 minutes post-intervention                                                                                                   | No funding statement.                                                                             |
| Fuganti, 2018       | Brazil | To evaluate effect of prewarming vs usual care (cotton blankets) on body temperature | Tympanic temperature               | 1.Air temperature (OT)<br>2.Humidity (OT)                                                                                                                       | Adults >18yrs           | Elective gynaecological surgery | 86  | I: Preoperatively<br>O: After prewarming and at 30 minute intervals until end of surgery                                                               | No funding statement.                                                                             |
| Garcia, 2018        | Brazil | To compare therapeutic listening versus standard care                                | Anxiety                            | 1.Surgical fears<br>2.Salivary cortisol;<br>3.HR; 4.RR; 5.SBP;<br>6.DBP                                                                                         | Adults >18yrs           | Surgery for colorectal cancer   | 50  | I: Day of surgery<br>O: Pre-intervention at 2.5hrs, then 1 hour post-procedure                                                                         | Supported by Conselho Nacional de Desenvolvimento Cientifico e Tecnológico (CNPq), Brazil, grant. |
| Gomez-Urquiza, 2016 | Spain  | To compare projection of photos vs photos and music vs usual care                    | Anxiety                            | 1.HR; 2.RR; 3.DBP;<br>4.SBP                                                                                                                                     | Adults aged 25-50yrs    | ENT surgery                     | 180 | I: Day of surgery<br>O: Preoperatively from 45-120minutes prior to surgery                                                                             | No funding received.                                                                              |
| Gross, 2016         | USA    | To assess outcomes after three different dressing practices                          | Air leak                           | 1.Patient comfort<br>2. Skin integrity at incision site                                                                                                         | Adults >18yrs           | Patients with chest drains      | 64  | I: Following insertion of chest tube in operating room.<br>O: Upon postoperative arrival to Trauma Centre and then daily up until a maximum of 5 days. | No funding statement.                                                                             |
| Groton, 2015        | USA    | To evaluate effectiveness, tolerability                                              | Effectiveness of bowel preparation | 1.Tolerability<br>2.Cost                                                                                                                                        | Adults >18yrs           | Outpatient colonoscopy          | 276 | I: Prior to colonoscopy                                                                                                                                | No funding received.                                                                              |

Nurse-led randomized controlled trials in the perioperative setting: a scoping review

|                   |             |                                                                         |                            |                                                                                                     |                         |                                                |     |                                                                                                                                                 |                                                                                                        |
|-------------------|-------------|-------------------------------------------------------------------------|----------------------------|-----------------------------------------------------------------------------------------------------|-------------------------|------------------------------------------------|-----|-------------------------------------------------------------------------------------------------------------------------------------------------|--------------------------------------------------------------------------------------------------------|
|                   |             | and cost of three bowel preparations (3 groups)                         |                            |                                                                                                     |                         |                                                |     | O: During colonoscopy, post-procedure and at follow-up clinic                                                                                   |                                                                                                        |
| Ham, 2017         | South Korea | To assess saline solution replacement vs not changing saline solution   | Colony forming units (CFU) | Nil                                                                                                 | Adults >18yrs           | Colectomy for colon cancer                     | 52  | I: Intraoperatively: after colon removal (intervention)<br>O: 48hrs post collection                                                             | Funded by Konkuk University GLOCAL Campus, Republic of Korea.                                          |
| Handan, 2018      | Turkey      | To assess impact of music during caesarean delivery vs usual care       | Anxiety: VAS               | 1.Body temperature<br>2.Oxygen saturation<br>3.Respiration rate<br>4.Heart rate<br>5. SBP<br>6. DBP | Females                 | Cesarean delivery for multiple births          | 60  | I: During surgery<br>O: At the end of surgery                                                                                                   | Supported by the Scientific Research Project Fund of Karamanoglu Mehmetbey University.                 |
| He, 2015          | Singapore   | To assess therapeutic care vs standard care (plus information pamphlet) | Anxiety                    | 1.Negative emotional manifestation<br>2.Postoperative pain                                          | Pediatric: aged 6-14yrs | Inpatient elective surgery                     | 95  | I: 3-7days prior to surgery<br>O: Baseline, day of surgery, 24hrs post-surgery                                                                  | Funded by the National Medical Research Council New Investigator Grant, Ministry of Health, Singapore. |
| Hoffman, 2017     | USA         | To assess efficacy of P6 acupressure versus placebo                     | PONV incidence             | N/A                                                                                                 | Adults                  | Planned ambulatory surgery; high risk for PONV | 110 | I: Preoperatively: 30-60mins pre-induction<br>O: Three recovery phases: Phase 1 (PACU); Phase 2 (pre-discharge); Phase 3 (24hrs post-discharge) | No funding statement.                                                                                  |
| Kapritsou, 2018   | Greece      | To compare fast-track conventional recovery protocols                   | Length of stay             | 1.Readmission rates<br>2.Complications<br>3.Pain: VAS                                               | Adults: 30-82yrs        | Hepatectomy                                    | 62  | I: Immediately after surgery<br>O: Point of discharge                                                                                           | No funding received.                                                                                   |
| Karunagaran, 2016 | India       | To assess video-assisted learning vs usual care                         | Knowledge                  | 1.Anxiety: STAI<br>2.Physiological & behavioural responses                                          | Adults                  | Gastroscopy                                    | 72  | I: Pre-procedure<br>O: 30 mins prior to procedure                                                                                               | College of Nursing, Christian Medical College, Vellore, Tamil Nadu.                                    |

Nurse-led randomized controlled trials in the perioperative setting: a scoping review

|                                      |           |                                                                                                                     |                                         |                                                                                                     |                   |                                                                      |     |                                                                                                                      |                                                                                                          |
|--------------------------------------|-----------|---------------------------------------------------------------------------------------------------------------------|-----------------------------------------|-----------------------------------------------------------------------------------------------------|-------------------|----------------------------------------------------------------------|-----|----------------------------------------------------------------------------------------------------------------------|----------------------------------------------------------------------------------------------------------|
|                                      |           |                                                                                                                     |                                         | 3.Relationship between knowledge, anxiety and physiological responses                               |                   |                                                                      |     |                                                                                                                      |                                                                                                          |
| Kelly, 2017                          | USA       | To assess effectiveness of folded and rolled dry cotton blankets warmed in 130°F or 200°F cabinets                  | Skin temperature                        | 1.Thermal comfort<br>2.Safety                                                                       | Adults >18yrs     | Hospital volunteers or employees (healthy volunteers)                | 20  | I: In-vitro (in perioperative setting)<br>O: at regular intervals up to 40mins after blanket application.            | No funding statement.                                                                                    |
| Klintworth * clinical trial protocol | USA       | To examine the use of 2% chlorhexidine gluconate cloths preoperatively & daily postoperatively versus standard care | Surgical site infection                 | 1.Serious adverse events<br>2. Mortality                                                            | Adults >18yrs     | Colorectal surgery                                                   | 163 | I: Pre & postoperatively up to 4 days<br>O: Up to 30 days postoperatively                                            | No funding statement.                                                                                    |
| Koenen, 2017                         | Australia | To compare reflective blankets vs cotton blankets for reduction of core-periphery heat gradient                     | Preoperative change in foot temperature | 1.Normothermia on arrival to PACU<br>2.Proportion of patients requesting additional warmed blankets | Adults            | Elective surgery <1hr duration                                       | 328 | I: Preoperative holding bay<br>O: On admission and then at regular intervals until before discharge from PACU        | Supported by the NSW Health Education and Training Institute (Rural Research Capacity Building Program). |
| Kose, 2016                           | Turkey    | To assess different hair shaving practices                                                                          | Surgical site infection (SSI)           | Body image                                                                                          | Adults            | Elective cranial surgery                                             | 200 | I: Preoperatively in operating theatre (OT)<br>O: Postoperatively: first; third; fourth; seventh; tenth days         | Funded by Gulhane Military Medical Academy Scientific Research Council.                                  |
| Kurtovic, 2017                       | Croatia   | To compare postoperative analgesic efficacy of intermittent vs PCA paracetamol                                      | Postoperative analgesic efficacy        | Nil                                                                                                 | Adults aged 27-80 | Elective lumbar discectomy of intervertebral disc extrusion at L4-L5 | 56  | I: In OT of completion of surgery to 48hrs post-op; every 6hrs<br>O: In OT of completion of surgery to 48hrs post-op | No funding statement.                                                                                    |

Nurse-led randomized controlled trials in the perioperative setting: a scoping review

|               |           |                                                                                                                             |                                                |                                                             |                         |                                                   |     |                                                                                          |                                                                                                                                     |
|---------------|-----------|-----------------------------------------------------------------------------------------------------------------------------|------------------------------------------------|-------------------------------------------------------------|-------------------------|---------------------------------------------------|-----|------------------------------------------------------------------------------------------|-------------------------------------------------------------------------------------------------------------------------------------|
| Lee, 2015     | Taiwan    | To compare postoperative heat-preserving gown versus cotton cloths to reduce duration of hypothermia                        | Hypothermia duration                           | 1. Cost effectiveness<br>2. Thermal comfort                 | Adults                  | Post-spinal surgery (in PACU)                     | 100 | I: PACU<br>O: Postoperatively: on admission to PACU until normothermia achieved          | No funding statement.                                                                                                               |
| Lee, 2018     | Taiwan    | To assess nurse-delivered education with video vs standard care                                                             | Anxiety: STAI and cortisol levels              | Pain                                                        | Adults $\geq$ 20yrs     | Lumbar spinal surgery                             | 86  | I: Day before surgery<br>O: Day before surgery; 30mins pre-surgery; day after surgery    | No funding statement.                                                                                                               |
| Li, 2014      | Hong Kong | To assess therapeutic play with dolls versus standard care (preoperative preparation)                                       | Anxiety (STAIC)                                | 1. Parental anxiety<br>2. Satisfaction (child and parental) | Pediatric: aged 7-12yrs | Elective surgery                                  | 108 | I: Day of surgery<br>O: Before and after intervention, post procedure                    | Supported by the Health and Health Services Research Fund, Food and Health Bureau, Hong Kong SAR Government.                        |
| Liguori, 2016 | Italy     | To examine Clickamico app with clown doctors versus standard care (brochure)                                                | Preoperative anxiety (m-YPAS)                  | Nil                                                         | Pediatric: aged 7-12yrs | Elective surgery                                  | 40  | I: Night prior to procedure<br>O: Afternoon before surgery, day of surgery (on transfer) | Funded by the Department of Health Sciences at the University of Florence, the Meyer Children's Hospital, and the Meyer Foundation. |
| LoRusso, 2018 | USA       | To evaluate blood glucose levels of Type II diabetic patients with use of etomidate vs propofol for induction of anesthesia | Perioperative blood glucose                    | Nil                                                         | Adults                  | Patients with Type II diabetes undergoing surgery | 18  | I: At induction<br>O: At induction and following emergence from anaesthesia              | No funding statement.                                                                                                               |
| Lynch, 2015   | USA       | To compare room air vs carbon dioxide (CO <sub>2</sub> ) insufflation                                                       | Pain (intra- and post-operatively): non-verbal | 1. Length of recovery<br>2. Nursing tasks and time          | Adults                  | Routine screening or surveillance colonoscopy     | 191 | I: During procedure<br>O: During and post procedure                                      | No funding received.                                                                                                                |

Nurse-led randomized controlled trials in the perioperative setting: a scoping review

|                 |           |                                                                                                    |                                   |                                                                                                                                                                                                   |                                                               |                                                                 |                          |                                                                                           |                                                                                  |
|-----------------|-----------|----------------------------------------------------------------------------------------------------|-----------------------------------|---------------------------------------------------------------------------------------------------------------------------------------------------------------------------------------------------|---------------------------------------------------------------|-----------------------------------------------------------------|--------------------------|-------------------------------------------------------------------------------------------|----------------------------------------------------------------------------------|
|                 |           |                                                                                                    | and verbal pain scale             |                                                                                                                                                                                                   |                                                               | under moderate sedation                                         |                          |                                                                                           |                                                                                  |
| Ma, 2015        | China     | To assess three perineal disinfection solutions                                                    | Preoperative bacterial count      | Nil                                                                                                                                                                                               | Adults or pediatric                                           | Urethral opening surgery                                        |                          | I: Five times a day<br>O: 1 and 2 days post-procedure                                     | No funding statement.                                                            |
| Martin, 2014    | USA       | To examine the impact of therapeutic suggestion under anesthesia                                   | LOS                               | 1. Anxiety: VAS and Child Rating of Anxiety (CRA) scale<br>2. Pain (FLACC and Wong Baker FACES scale)<br>3. Intravenous morphine dosage<br>4. PONV<br>5. Emergence delirium<br>6. Implicit memory | Paediatric: aged 4-8yrs and self-identified primary caregiver | Non-coblation tonsillectomy or adenotonsillectomy               | 94 child-caregiver pairs | I: Completion of surgery until readiness to wake up in PACU<br>O: postoperatively (PACU)  | Funded by ASPAN grant, and an XTO Energy Clinical Scholars Grant                 |
| McClurkin, 2016 | USA       | To assess impact of self-selected music versus music versus no music (usual care)                  | Anxiety (STAI)                    | 1. Patient satisfaction<br>2. Relationship between STAI and NVAAS                                                                                                                                 | Adults: 18-75yrs                                              | Day surgery (multiple specialities)                             | 133                      | I: Preoperatively<br>O: Afternoon prior to surgery, day of surgery (on transfer)          | Funded by Baylor St. Luke's Nursing Research Council and the Friends of Nursing. |
| Mirbagher, 2016 | Iran      | To assess effects of mentoring vs usual learning activities                                        | Clinical perioperative competence | Nil                                                                                                                                                                                               | Adults                                                        | Operating room students                                         | 60                       | I: Over 15 months<br>O: Before and after intervention                                     | No funding statement.                                                            |
| Molloy, 2016    | USA       | To compare preventative use of dorzolamide-timolol ophthalmic solution with balanced salt solution | Intraocular pressure              | Time effects                                                                                                                                                                                      | Adults                                                        | Patients scheduled for prolonged steep Trendelenburg procedures | 90                       | I: Following induction of anesthesia<br>O: Baseline, then every 30 minutes during surgery | No funding statement.                                                            |
| Mousavi, 2018   | Iran      | To assess supportive educational nurse-led interventions vs standard care                          | Anxiety (STAI)                    | Sleep (GSQS)                                                                                                                                                                                      | Adults                                                        | Elective coronary artery bypass graft (CABG) surgery            | 160                      | I: One and two days prior to surgery<br>O: Day of admission, night before surgery         | Funded by Tehran University of Medical Sciences.                                 |
| Munday, 2018    | Australia | To compare preoperative warming                                                                    | Perioperative heat loss           | 1. Hypothermia                                                                                                                                                                                    | Women >18yrs                                                  | Women undergoing                                                | 50                       | I: Preoperatively                                                                         | Funding by Perioperative                                                         |

Nurse-led randomized controlled trials in the perioperative setting: a scoping review

|               |        |                                                                                                  |                      |                                                                                                                                                                         |                 |                                                                |     |                                                                                                                              |                                                                                                                                                                           |
|---------------|--------|--------------------------------------------------------------------------------------------------|----------------------|-------------------------------------------------------------------------------------------------------------------------------------------------------------------------|-----------------|----------------------------------------------------------------|-----|------------------------------------------------------------------------------------------------------------------------------|---------------------------------------------------------------------------------------------------------------------------------------------------------------------------|
|               |        | plus IV fluid warming versus usual care including IV fluid warming                               |                      | 2. Maternal thermal comfort<br>3. Mean arterial pressure (MAP)<br>4. Shivering<br>5. Agreement between temperature devices<br>6. Neonatal temperature<br>7. Apgar score |                 | elective Cesarean delivery with intrathecal morphine           |     | O: Postoperatively up to discharge                                                                                           | Nurses Association of Queensland (PNAQ).                                                                                                                                  |
| Nieh, 2018    | Taiwan | To assess efficacy of forced air warming versus passive insulation on rewarming                  | Rewarming            | Thermal comfort                                                                                                                                                         | Adults >20yrs   | Laparoscopic thoracic or abdominal surgery over 1hr anesthesia | 127 | I: During anesthesia until PACU discharge<br>O: Every 30mins intraoperatively and PACU until normothermia achieved           | Taichung Veterans General Hospital, Republic of China.                                                                                                                    |
| Nilsson, 2014 | Sweden | To assess effectiveness of P6 acupressure (with Sea-Band) versus placebo on postoperative nausea | Postoperative nausea | Frequency of vomiting                                                                                                                                                   | Adults >18yrs   | Elective infratentorial or supratentorial craniotomy           | 120 | I: Applied at the end of surgery<br>O: On arrival to PACU; then at specified intervals until 48hrs postoperatively           | Devices partly provided by SeaBand Ltd.; remainder provided by Department of Neurosurgery of Umeå University Hospital. Study supported by hospital's research foundation. |
| Notte, 2016   | USA    | To measure effect of Reiki vs usual care on perceived pain                                       | Perceived pain       | 1. Postoperative analgesic consumption<br>2. Satisfaction with Reiki<br>3. Satisfaction with hospital experience                                                        | Adults 18-30yrs | Total knee arthroplasty (TKA)                                  | 43  | I: After admission; after admission to PACU; daily for 3 postoperative days<br>O: Before and after each treatment or at each | Funded by Sharpe/Strumia Research Foundation of Bryn Mawr Hospital.                                                                                                       |

Nurse-led randomized controlled trials in the perioperative setting: a scoping review

|                |        |                                                                                                                                              |                                                      |                                                                                                                                                                                                                       |                             |                                                                                      |     |                                                                                                         |                                                                                     |
|----------------|--------|----------------------------------------------------------------------------------------------------------------------------------------------|------------------------------------------------------|-----------------------------------------------------------------------------------------------------------------------------------------------------------------------------------------------------------------------|-----------------------------|--------------------------------------------------------------------------------------|-----|---------------------------------------------------------------------------------------------------------|-------------------------------------------------------------------------------------|
|                |        |                                                                                                                                              |                                                      |                                                                                                                                                                                                                       |                             |                                                                                      |     | participant/nurse encounter                                                                             |                                                                                     |
| Oh, 2017       | Korea  | To compare effects of transcutaneous electrical nerve stimulation relief band with wrist band with acupressure on Nei-Guan acupuncture point | PONV (Rhodes Index of Nausea, Vomiting and Retching) | Frequency of patient-requested anti-emetics                                                                                                                                                                           | Adult females aged 16-65yrs | Gynaecology surgery under general anesthesia with patient-controlled analgesia (PCA) | 54  | I: Prior to anesthesia<br>O: at 0-24hours after PACU discharge                                          | No funding received.                                                                |
| Oliveira, 2016 | Brazil | To assess preoperative orientation video vs usual care                                                                                       | Patient knowledge                                    | Nil                                                                                                                                                                                                                   | Adults ≥18yrs               | Cardiac surgery                                                                      | 90  | I: Approximately 72hrs prior to surgery<br>O: Post-intervention                                         | Funded by Fundo de Apio à Pesquisa do Instituto de Cardiologia (FAPIC)              |
| Ozlu, 2018     | Turkey | To assess the effect of cold application vs no cold application on pain & bleeding                                                           | Pain                                                 | Bleeding                                                                                                                                                                                                              | Adults >18yrs               | Septoplasty to correct deviated septum                                               | 60  | I: In ENT clinic for 15 minutes prior to surgery<br>O: Postoperatively at regular intervals up to 24hrs | No funding received.                                                                |
| Palese, 2015   | Italy  | To assess postoperative shampooing versus no shampooing                                                                                      | Comfort                                              | 1.Surgical site contamination (CFU)<br>2. Surgical site infection                                                                                                                                                     | Adults >18yrs               | Elective craniotomy                                                                  | 53  | I: Post-procedure<br>O: 30 days post-surgery                                                            | No funding statement.                                                               |
| Paris, 2014    | USA    | To examine effect of various warming methods on maternal body temperature during Cesarean delivery                                           | Maternal core body temperature                       | 1.Maternal hypothermia<br>2.Estimated blood loss (EBL)<br>3. Postoperative pain<br>4. Rescue blanket use<br>5. Maternal shivering<br>6.Maternal-newborn bonding<br>7.First axillary newborn temperature<br>8. Cord pH | Women                       | Elective, singleton Cesarean delivery                                                | 226 | I: Preoperatively until 2hrs post-delivery<br>O: Preoperatively through to fourth postpartum hour.      | Medline Industries donated the Warming Pad and temperature sensing Foley catheters. |

Nurse-led randomized controlled trials in the perioperative setting: a scoping review

|                 |           |                                                                                                                    |                                                                                  |                                                                                                                                                                                                                          |               |                                                                                                                 |     |                                                                                                                                                                                   |                                                                                                     |
|-----------------|-----------|--------------------------------------------------------------------------------------------------------------------|----------------------------------------------------------------------------------|--------------------------------------------------------------------------------------------------------------------------------------------------------------------------------------------------------------------------|---------------|-----------------------------------------------------------------------------------------------------------------|-----|-----------------------------------------------------------------------------------------------------------------------------------------------------------------------------------|-----------------------------------------------------------------------------------------------------|
|                 |           |                                                                                                                    |                                                                                  | 9. Apgar scores (1 & 5mins)                                                                                                                                                                                              |               |                                                                                                                 |     |                                                                                                                                                                                   |                                                                                                     |
| Piredda, 2016   | Italy     | To evaluate effectiveness of information booklet alone or with clarification questions vs standard care (3 groups) | Short and long term knowledge regarding totally implantable access ports (TIAPs) | Physiological indicators of anxiety                                                                                                                                                                                      | Adults ≥18yrs | Patients diagnosed with cancer, admitted to day surgery for insertion of totally implantable access port (TIAP) | 105 | I: In Day Surgery waiting room<br>O: Before TIAP implantation, in waiting room; at 3 months                                                                                       | Funded by Center of Excellence of Nursing Research and Culture, Nursing Professional Board of Rome. |
| Pool, 2015      | USA       | To assess raising head of bed (HOB) to 15 degrees vs keeping flat                                                  | Patient comfort: pain (VAS)                                                      | Nil                                                                                                                                                                                                                      | Adults        | Cardiac angiography                                                                                             | 71  | I: Post-procedure<br>O: Before procedure; every 15 mins post-procedure                                                                                                            | No funding statement.                                                                               |
| Pu, 2014        | China     | To assess feasibility & efficacy of intraoperative underbody warming vs passive warming                            | Intraoperative hypothermia                                                       | 1.Temperature decline ( via nasopharyngeal temperature)<br>2.Prothrombin time<br>3.Activated partial thromboplastin time<br>4.Thrombin time<br>5.Complications: in OT and postoperatively<br>6.Shivering<br>7.Pain (VAS) | Adults >18yrs | Open and laparoscopic surgery for gastrointestinal tumours                                                      | 110 | I: Intraoperatively<br>O: Primary outcome: from anesthesia induction; every 20 mins until end of procedure.<br>Secondary outcomes: in OT; end of anaesthesia; postoperative day 1 | Funded by the Science and Technology Commission of Shanghai Jiao Tong University.                   |
| Qvarfordh, 2014 | Denmark   | To assess mobilization shortly after lumbar disc surgery vs wheeling from PACU to ward                             | Feasibility                                                                      | 1.Safety<br>2.Wellbeing: Bournemouth Questionnaire                                                                                                                                                                       | Adults >18yrs | Elective lumbar discectomy                                                                                      | 22  | I: One hour postoperatively<br>O: One hour postoperatively                                                                                                                        | Funded by Glostrup Hospital, the Capital Region of Denmark.                                         |
| Reynolds, 2015  | Australia | To assess BPU, SSD and TA versus usual care                                                                        | Feasibility                                                                      | 1. Peripheral arterial catheter failure                                                                                                                                                                                  | Adults >18yrs | Surgical patients booked for                                                                                    | 123 | I: Operating theatre                                                                                                                                                              | Funding provided for products by the                                                                |



Nurse-led randomized controlled trials in the perioperative setting: a scoping review

|                   |        |                                                                                                |                                  |                                                                                                                                                       |                                 |                                                                                     |     |                                                                                                                                  |                                                                                           |
|-------------------|--------|------------------------------------------------------------------------------------------------|----------------------------------|-------------------------------------------------------------------------------------------------------------------------------------------------------|---------------------------------|-------------------------------------------------------------------------------------|-----|----------------------------------------------------------------------------------------------------------------------------------|-------------------------------------------------------------------------------------------|
|                   |        |                                                                                                |                                  | 2. Dislodgement<br>3. Occlusion<br>4. Phlebitis<br>5. Infection: local or CRBSI                                                                       |                                 | postoperative ICU                                                                   |     | O: On insertion of arterial catheter in OT; daily in ICU; on ICU discharge                                                       | Alliance for Vascular Access Teaching and Research Group (AVATAR) at Griffith University. |
| Razera, 2016      | Brazil | To assess use of educational video versus usual care                                           | Knowledge of informal caregivers | Nil                                                                                                                                                   | Unclear: caregivers of children | Informal caregivers of children undergoing primary cheiloplasty and/or palatoplasty | 80  | I: Postoperatively, on day of discharge (24hrs post-surgery)<br>O: Peri and postoperatively on discharge                         | PhD scholarship funding by Fundação de Amparo à Pesquisa do Estado de São Paulo (FAPESP)  |
| Rhodes, 2015      | USA    | To assess effect of preoperative education and orientation versus no education and orientation | Anxiety                          | 1. Caregiver anxiety<br>2. Length of stay (LOS)<br>3. Morphine equivalent use<br>4. Patient/caregiver satisfaction                                    | Aged 11-21yrs                   | Posterior spinal fusion (PSF) surgery                                               | 65  | I: Preoperative<br>O: Two weeks preoperatively, immediately prior to surgery, during surgery, postoperative day 2, on discharge. | No funding statement.                                                                     |
| Sáenz-Jalón, 2017 | Spain  | To assess the limb occlusion pressure technique versus standard pneumatic ischemia technique   | Arterial blood pressure          | 1. Ischemia time<br>2. Anesthetic incidents: pain, administration of opiates<br>3. Surgical incidents: interruptions to procedure; bleeding<br>4. LOS | Adults                          | Upper limb surgery requiring surgical ischemia and locoregional anesthesia          | 160 | I: Intraoperative<br>O: intraoperatively and postoperatively (LOS)                                                               | Funded by Premio Nacional de Investigación de Enfermería Valdecilla del año 2012.         |
| Sahin 2018        | Turkey | To evaluate acupressure versus placebo application on P6 acupoint                              | PONV                             | 1. Postoperative pain severity<br>2. Analgesic drug requirement<br>3. Anxiety                                                                         | Adult (females)                 | Laparoscopic cholecystectomy                                                        |     | I: One hour prior to surgery<br>O: At 2, 6 and 24hrs postoperatively                                                             | No funding received.                                                                      |

Nurse-led randomized controlled trials in the perioperative setting: a scoping review

|                        |       |                                                                                                                           |                                                           | 4. Patient feedback                                                                                                     |                                       |                                                                                                |                                   |                                                                                                               |                                 |
|------------------------|-------|---------------------------------------------------------------------------------------------------------------------------|-----------------------------------------------------------|-------------------------------------------------------------------------------------------------------------------------|---------------------------------------|------------------------------------------------------------------------------------------------|-----------------------------------|---------------------------------------------------------------------------------------------------------------|---------------------------------|
| Salomon, 2018          | USA   | To assess preoperative telephone communication by nurse anesthetist vs standard care (face-to-face on morning of surgery) | Anxiety: Amsterdam Preoperative Anxiety (APAIS); STAI Y-1 | Nil                                                                                                                     | Adults                                | Office-based anesthesia for urological procedures                                              | 41                                | I: Preoperative: night before surgery (intervention) / day of surgery (control)<br>O: Pre and postoperatively | No funding statement.           |
| Simeone, 2017          | Italy | To evaluate the efficacy of a nursing educational intervention                                                            | Parental anxiety: STAI                                    | Nil                                                                                                                     | Adults                                | Parents of children undergoing cardiac surgery for interventricular defect for the first time. | 96                                | I: Preoperatively<br>O: Unclear (stated pre and postoperatively)                                              | No funding statement.           |
| Sites, 2014            | USA   | To evaluate controlled breathing with peppermint aromatherapy vs controlled breathing alone for PONV relief               | PONV                                                      | Administration of postoperative anti-emetics                                                                            | Adults ≥18yrs                         | Elective laparoscopic, ENT, orthopaedic or urological day surgery under GA with intubation     | 330                               | I: Upon initial report of PONV in PACU or Day Surgery<br>O: Postoperatively in PACU or Day Surgery            | No funding statement.           |
| Stallings-Welden, 2018 | USA   | To examine effectiveness of aromatherapy with standard care for PONV                                                      | PONV                                                      | 1.Post discharge nausea and vomiting (PDNV)<br>2.Risk factors for PONV                                                  | Adults >18yrs                         | Ambulatory surgical patients                                                                   | 221                               | I: Postoperatively and through discharge<br>O: Postoperatively and after discharge                            | No funding statement.           |
| Stewart, 2018          | USA   | To compare tablet-based interactive distraction with oral midazolam                                                       | Preoperative anxiety (m YPAS-SF)                          | 1.Emergence delirium<br>2.PACU LOS<br>3.Caregiver anxiety (7-point Likert)<br>4.Caregiver satisfaction (7-point Likert) | Pediatric aged 4-12yrs and caregivers | Outpatient surgery                                                                             | 102 patients (and 102 caregivers) | I: Pre-induction<br>O: On admission; parental separation; mask induction and then on emergence.               | Funded by West Coast University |

Nurse-led randomized controlled trials in the perioperative setting: a scoping review

|             |        |                                                                                         |                            |                                                                                      |                      |                                                                                                                   |     |                                                                                                                                      |                                                                                                                    |
|-------------|--------|-----------------------------------------------------------------------------------------|----------------------------|--------------------------------------------------------------------------------------|----------------------|-------------------------------------------------------------------------------------------------------------------|-----|--------------------------------------------------------------------------------------------------------------------------------------|--------------------------------------------------------------------------------------------------------------------|
| Su, 2018    | Taiwan | To assess efficacy of forced air warming versus passive insulation                      | Perioperative hypothermia  | 1.Shivering<br>2.Pain<br>3.Blood loss<br>4.Adverse cardiac events                    | Adults >20yrs        | Laparoscopic thoracic or abdominal surgery                                                                        | 124 | I: During anesthesia, intraoperatively until end of PACU<br>O: Every 30mins intraoperatively and in PACU until normothermia achieved | Taichung Veterans General Hospital, Republic of China.                                                             |
| Tsai 2017   | Taiwan | To assess effectiveness of three antiseptic handwashing methods amongst surgical staff. | CFU counts                 | Time for hand cleansing                                                              | Adults               | Practicing surgeons and scrub nurses with experience of conventional surgical and waterless hand rub OT protocols |     | I: Immediately preoperatively<br>O: Before and after surgical hand disinfection, immediately after operation                         | Funded by Taipei Medical University, Shuang Ho Hospital                                                            |
| Ugras, 2018 | Turkey | To assess different types of music vs no music (3 groups)                               | Preoperative anxiety: STAI | 1.SBP<br>2.DBP<br>3.Heart rate<br>4.Cortisol levels                                  | Adults               | Surgical otorhinolaryngology patients                                                                             | 180 | I: Music for 30mins pre-procedure<br>O: At completion of intervention                                                                | No funding received.                                                                                               |
| Ullan, 2014 | Spain  | To assess effect of play vs usual care                                                  | Post-surgical pain: FLACC  | Nil                                                                                  | Paediatric: ages 1-7 | Elective surgery                                                                                                  | 95  | I: During hospital stay<br>O: Each hour postoperatively; commencing when consciousness regained                                      | Funded by The Council of Education of the Junta of Castilla and Leon Spain, and the Spanish Ministry of Education. |
| Unulu, 2018 | Turkey | To assess effectiveness of P6 acupuncture                                               | Nausea intensity           | 1.Patient information<br>2.Anxiety<br>3. Perianesthesia comfort<br>4.General comfort | Adults               | Gynaecologic (not obstetric) surgery                                                                              |     | I: Within 12 hours after procedure<br>O: Postoperatively: 0-2; 2-6; 6-12; 12-24 and 24-48hrs                                         | No funding statement.                                                                                              |

Nurse-led randomized controlled trials in the perioperative setting: a scoping review

|                |           |                                                                      |                                |                                                                                                                             |                      |                                                                                                                                    |      |                                                                                         |                                                                                      |
|----------------|-----------|----------------------------------------------------------------------|--------------------------------|-----------------------------------------------------------------------------------------------------------------------------|----------------------|------------------------------------------------------------------------------------------------------------------------------------|------|-----------------------------------------------------------------------------------------|--------------------------------------------------------------------------------------|
| Webster, 2014  | Australia | To assess consumption of carbohydrate fluids vs usual care           | Time to readiness to discharge | 1.Time to first flatus<br>2.Time to first bowel movement<br>3.Mortality (from any cause during trial)<br>4.Adverse outcomes | Adults $\geq 18$ yrs | Elective bowel surgery                                                                                                             | 46   | I: From 19.00 the night prior to surgery<br>O: Postoperatively                          | No funding statement.                                                                |
| Wilson, 2016   | Canada    | To assess individualised education prevention                        | Nausea                         | 1.Pain<br>2. Analgesic and anti-emetic administration                                                                       | Adults               | Total knee replacement surgery                                                                                                     |      | I: Preoperatively<br>O: Postoperatively day 3                                           | Partially funded by the Kingston General Hospital Women's Auxiliary Millennium Fund. |
| Wistrand, 2016 | Sweden    | To compare preheated and room temperature skin disinfectant solution | Skin temperature               | Patients' experience                                                                                                        | Adults $>18$ yrs     | Patients undergoing pacemaker, implantable cardioverter-defibrillator or cardiac resynchronisation therapy under local anaesthesia | 220  | I: OT (immediately prior to procedure)<br>O: Before and after skin disinfection (in OT) | Funded by research council of Örebro County Council.                                 |
| Wu, 2019       | China     | To assess safety and feasibility of early oral hydration in PACU     | PONV                           | 1.Thirst<br>2.Incidence of oropharyngeal discomfort<br>3.Patient satisfaction                                               | Adults               | Elective laparoscopic cholecystectomy                                                                                              | 1735 | I: Postoperatively (PACU)<br>O: Postoperatively up to day 1                             | Funded by the Sichuan Provincial Health Department.                                  |
| Zaman, 2018    | Iran      | To assess effect of warm versus room temperature IV fluids           | Shivering                      | 1.Core temperature<br>2.Oxygen saturation<br>3.Vital signs                                                                  | Adults               | Elective abdominal surgery                                                                                                         | 70   | I: Intraoperatively<br>O: Postoperatively: on admission to PACU and at 30 mins in PACU  | No funding statement.                                                                |

**List of Abbreviations used in table:**

APAIS: Amsterdam Preoperative Anxiety and Information Scale

AORN: Association of periOperative Registered Nurses

ASA: American Society of Anesthesiologists

ASPAN: American Society of PeriAnesthesia Nurses

BPU: Bordered Polyurethane

CO<sub>2</sub>: Carbon Dioxide

CRBSI: Catheter-related bloodstream infection

DBP: diastolic blood pressure

ENT: Ear, nose and throat

FLACC: Faces, Legs, Activity, Cry, Consolability Scale

GSQS: Groningen's Sleep Quality Scale

HR: heart rate

IV: intravenous

LOS: length of stay

MAP: mean arterial pressure

mYPas: modified Yale Preoperative Anxiety Scale

mYPAS-SF: modified Yale Preoperative Anxiety Scale Short Form

NHMRC: National Health and Medical Research Council

NRS: Numerical Visual Anxiety Scale

## Nurse-led randomized controlled trials in the perioperative setting: a scoping review

NVAAS: Numerical Visual Analog Anxiety Scale

OT: operating theatre

P6: pericardium 6

PACU: Post Anesthetic Care Unit

PCA: patient-controlled analgesia

PONV: Post-Operative Nausea and Vomiting

RR: respiratory rate

SBP: systolic blood pressure

SSD: sutureless securement device

STAI: State-Trait Anxiety Inventory

STAIC: State-Trait Anxiety Inventory for Children

STAI-Y: State-Trait Anxiety Inventory (Form Y)

STTI: Sigma Theta Tau International

TA: tissue adhesive

VAS: Visual Analog Scale

Y-PAS: Yale Preoperative Anxiety Scale
